# Supplementary material
Source: PubMed Central journal article supplement (PMC4011340)
Supplement: cr201437x2.pdf [file cr201437x2.pdf]

**Supplementary information, Table S2** List of genes used for IPA to determine canonical pathways differentially enriched between PTEN normal/trastuzumab resistant vs. PTEN high/trastuzumab sensitive breast cancer patients.

| Gene name  | Gene name     | Gene name |
|------------|---------------|-----------|
| SPIB       | IGHG1         | GREB1     |
| ATP8A2     | EVI2A         | PDCL3P4   |
| APOD       | ELMO1         | ROPN1B    |
| KLK11      | IGHM          | BNIP3P1   |
| GNLY       | BLNK          | TRIB2     |
| ARHGAP25   | ATHL1         | KRT15     |
| PPP1R16B   | TNFSF10       | CEACAM6   |
| CCL5       | CD19          | PLAGL1    |
| LRMP       | COL11A1       | KRT19     |
| TCL1A      | PEG10         | LGALS3BP  |
| ISG20      | AGAP11        | GIN51     |
| CD52       | KLF2          | HSPA7     |
| PPP1R2P4   | ZMYND11       | SOX10     |
| KIAA0226L  | HRAS          | sept      |
| GIMAP5     | AQP3          | MXRA7     |
| AL512428.1 | NEFH          | ILF2      |
| IGKV2D-28  | SIGIRR        | GDI2      |
| LGALS2     | SNORA11       | COX5B     |
| IGKV1D-17  | RP11-510N19.5 | PERP      |
| IGKV1D-13  | AL590708.1    | HEBP2     |
| AC129778.7 | U4            | ALDOA     |
| PTPRC      | PDCL3P6       |           |
| AC016745.2 | U1            |           |
| TFAP2B     | AMYP1         |           |
| AC096579.7 | LLGL2         |           |
| EVI2B      | JMJD6         |           |
| ADIPOQ     | SOX9          |           |
