# Supplementary material
Source: PubMed Central journal article supplement (PMC4011340)
Supplement: cr201437x3.pdf [file cr201437x3.pdf]

**Supplementary information, Table S3** List of proteins with downregulated expression/phosphorylation in Ab7.16.4+lapatinib sensitive PTEN<sup>-/-</sup>/NIC transplants compared to control and resistant tumors.

| Antibody                | Vehi cle-1 | Vehi cle-2 | Vehi cle-3 | Ab+Lapa _sens-1 | Ab+Lapa _sens-2 | Ab+Lapa _sens-3 | Ab+Lapa _res-1 | Ab+Lapa _res-2 | Ab+Lapa _res-3 |
|-------------------------|------------|------------|------------|-----------------|-----------------|-----------------|----------------|----------------|----------------|
| 53BP1                   | 0.01       | 0.00       | 0.13       | -0.18           | -0.61           | -1.13           | 0.00           | 0.08           | 0.16           |
| Akt_pS473               | 0.06       | 0.09       | -0.08      | 0.01            | -0.87           | -1.67           | 0.01           | 0.00           | -0.20          |
| C-Raf                   | 0.04       | -0.01      | 0.12       | -0.31           | -0.63           | -0.68           | -0.18          | 0.00           | 0.16           |
| Chk1_pS345              | 0.09       | 0.10       | 0.12       | 0.08            | -0.34           | -0.48           | -0.31          | -0.04          | 0.14           |
| Claudin-7               | -0.04      | 0.41       | 1.24       | -0.23           | -0.43           | -0.87           | -0.14          | 0.41           | 0.99           |
| Dvl3                    | 0.23       | 0.00       | 0.31       | -0.19           | -0.14           | -0.51           | -0.01          | 0.32           | 0.25           |
| E-Cadherin              | 0.00       | -0.10      | 0.03       | -0.37           | -1.06           | -0.76           | 0.30           | 0.13           | -0.06          |
| eEF2                    | 0.19       | -0.22      | 0.10       | -0.03           | -0.34           | -0.75           | 0.08           | 0.18           | 0.08           |
| GSK3-alpha-beta_pS21_S9 | 0.27       | 0.67       | 0.40       | -0.24           | -1.01           | -0.41           | -0.59          | 0.00           | 0.39           |
| GSK3_pS9                | 0.45       | 0.77       | 0.57       | -0.16           | -0.76           | -0.26           | -0.63          | 0.00           | 0.57           |
| HER3                    | 0.00       | 0.30       | 0.43       | -0.40           | -1.16           | -1.33           | -0.08          | 0.13           | 0.46           |
| HER3_pY1298             | 0.08       | -0.09      | 0.12       | -0.48           | -0.54           | -0.66           | 0.00           | 0.21           | 0.15           |
| MEK1_pS217_S221         | 0.27       | 0.24       | 0.02       | -0.11           | -0.47           | -0.81           | 0.00           | 0.11           | -0.17          |
| mTOR                    | -0.02      | 0.06       | 0.26       | -0.31           | -0.38           | -0.46           | -0.38          | 0.01           | 0.24           |
| mTOR_pS2448             | 0.23       | -0.11      | 0.14       | 0.00            | -0.17           | -0.35           | -0.11          | 0.17           | 0.14           |
| Notch1                  | -0.16      | 0.21       | 0.34       | 0.00            | -0.60           | -0.58           | -0.58          | 0.29           | 0.53           |
| p27_pT198               | 0.05       | 0.05       | 0.00       | -0.24           | -0.34           | -0.43           | -0.03          | 0.28           | 0.13           |
| p70S6K                  | 0.13       | -0.22      | 0.11       | -0.15           | -0.53           | -0.63           | -0.17          | 0.19           | 0.06           |
| p90RSK                  | 0.00       | -0.08      | 0.12       | -0.45           | -1.00           | -1.14           | -0.28          | 0.11           | 0.07           |
| p90RSK_pT359_S363       | 0.23       | 0.31       | 0.45       | -0.49           | -0.80           | -0.83           | -0.12          | 0.00           | 0.11           |
| PDCD4                   | 0.37       | 0.37       | 0.00       | -0.56           | -1.05           | -1.20           | -0.24          | 0.13           | 0.14           |
| PDK1_pS241              | 0.10       | -0.25      | 0.12       | -0.23           | -0.35           | -0.70           | 0.06           | 0.08           | 0.02           |
| PRAS40_pT246            | 0.18       | 0.35       | 0.15       | -0.13           | -0.69           | -0.44           | -0.23          | 0.10           | 0.40           |
| Raptor                  | 0.00       | -0.02      | 0.12       | -0.20           | -0.10           | -0.43           | 0.00           | 0.08           | 0.10           |
| RBM15                   | -0.06      | 0.06       | 0.11       | -0.32           | -0.42           | -0.77           | -0.22          | 0.14           | 0.34           |
| Rictor_pT1135           | 0.17       | 0.59       | 0.41       | -0.24           | -0.49           | -0.33           | -0.22          | 0.00           | 0.35           |
| S6_pS235_S236           | 0.34       | 0.00       | -0.07      | -0.34           | -0.53           | -1.34           | 0.12           | 0.33           | 0.17           |

|                   |       |      |       |       |       |       |       |      |       |
|-------------------|-------|------|-------|-------|-------|-------|-------|------|-------|
| S6_pS240_S<br>244 | 0.15  | 0.16 | -0.16 | -0.41 | -1.02 | -1.51 | 0.05  | 0.12 | 0.00  |
| Smad1             | 0.05  | 0.00 | 0.00  | -0.05 | -0.27 | -0.41 | -0.13 | 0.25 | 0.03  |
| Smad3             | 0.20  | 0.00 | 0.21  | -0.01 | -0.15 | -0.22 | -0.06 | 0.20 | 0.20  |
| VEGFR2            | -0.02 | 0.03 | 0.10  | 0.00  | -0.62 | -1.64 | 0.42  | 0.18 | -0.02 |
| XRCC1             | 0.07  | 0.05 | 0.11  | -0.72 | -1.05 | -0.89 | 0.11  | 0.02 | 0.00  |
| YAP_pS127         | 0.00  | 0.13 | 0.12  | 0.07  | -0.32 | -0.75 | -0.02 | 0.01 | -0.01 |
