# Supplementary material
Source: PubMed Central journal article supplement (PMC4011340)
Supplement: cr201437x4.pdf [file cr201437x4.pdf]

**Supplementary information, Table S4** List of antibodies used in western blotting

| <b>Antibody</b>     | <b>Company</b> | <b>Catalog #</b> |
|---------------------|----------------|------------------|
| ErbB2 (Y1248)       | Abcam          | ab47755          |
| EGFR (Y1068)        | Cell Signaling | 3777             |
| Akt (S473)          | Cell Signaling | 4058             |
| Akt (T308)          | Cell Signaling | 4056             |
| Src (Y416)          | Cell Signaling | 6943             |
| Erk 1/2 (T202/Y204) | Cell Signaling | 4376             |
| p70S6 (T389)        | Cell Signaling | 9234             |
| S6 (S235/236)       | Cell Signaling | 5969             |
| S6 (S240/244)       | Cell Signaling | 2215             |
| 4EBP1 (T37/46)      | Cell Signaling | 2855             |
| 4EBP1 (S65)         | Cell Signaling | 9451             |
| ErbB2 (neu)         | Santa Cruz     | sc-284           |
| EGFR                | Cell Signaling | 4267             |
| PTEN                | Cell Signaling | 9559             |
| Akt                 | Cell Signaling | 9272             |
| Src                 | Cell Signaling | 2123             |
| Erk 1/2             | Cell Signaling | 4695             |
| p70S6K              | Cell Signaling | 2708             |
| S6                  | Cell Signaling | 2217             |
| 4EBP1               | Cell Signaling | 9452             |
| HSP90               | Cell Signaling | 4877             |
| Actin               | Sigma          | A5441            |
