# Supplementary material
Source: PubMed Central journal article supplement (PMC4011340)
Supplement: cr201437x5.pdf [file cr201437x5.pdf]

**Figure S1**

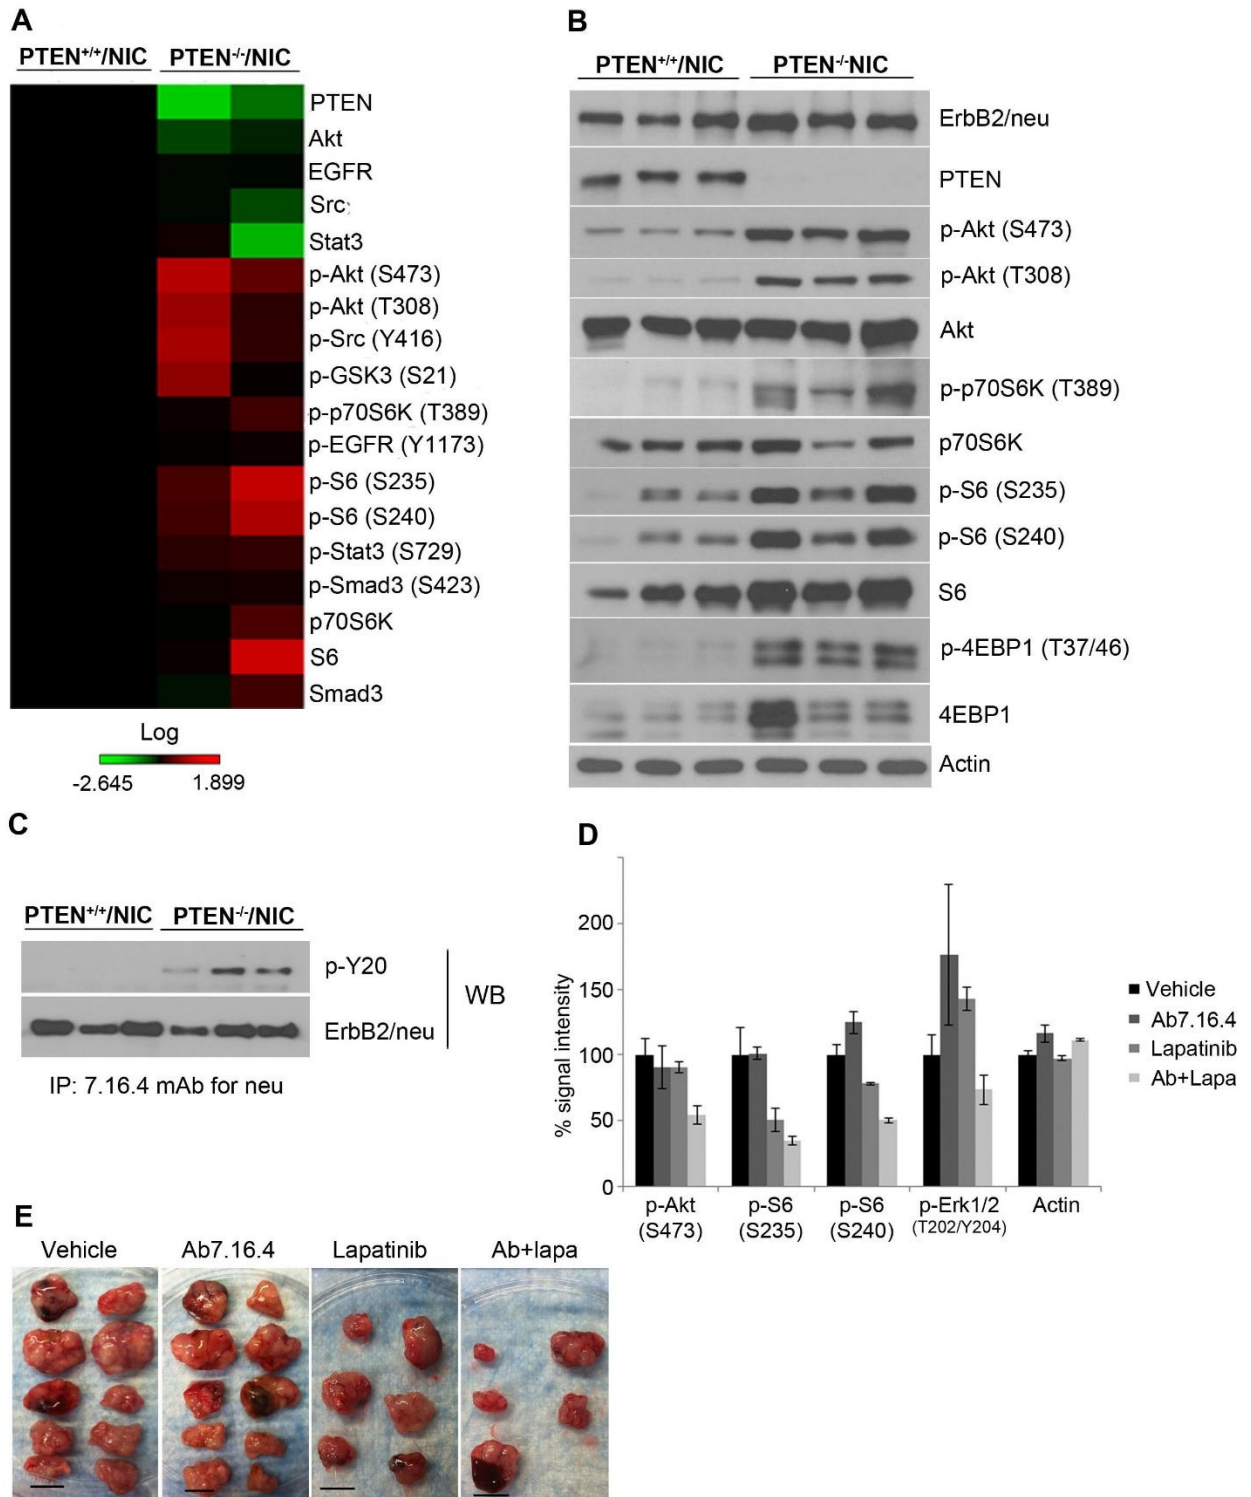

**Supplementary information, Figure S1** PTEN loss leads to activation of ErbB2 and its downstream signaling in PTEN<sup>-/-</sup>/NIC mice.

**(A)** Reverse phase protein array (RPPA) analysis of tumor lysates from PTEN<sup>+/+</sup>/NIC versus PTEN<sup>-/-</sup>/NIC mice. **(B)** Western blot validation of RPPA results for some of the key signaling pathway proteins at both

expression and phosphorylation levels. **(C)** Western blot with pan-phosphotyrosine antibody p-Y20 and ErbB2/neu antibody after immunoprecipitation of lysates from either PTEN<sup>+/+</sup>/NIC or PTEN<sup>-/-</sup>/NIC mice with Ab7.16.4. **(D)** Quantification of the western blot shown in Figure 1C by ImageJ software. Vehicle-treated samples are normalized to 100%. **(E)** Representative pictures of tumors from the mice treated with indicated drugs shown in Figure 1F.
