# Supplementary material
Source: PubMed Central journal article supplement (PMC4011340)
Supplement: cr201437x6.pdf [file cr201437x6.pdf]

**Figure S2**

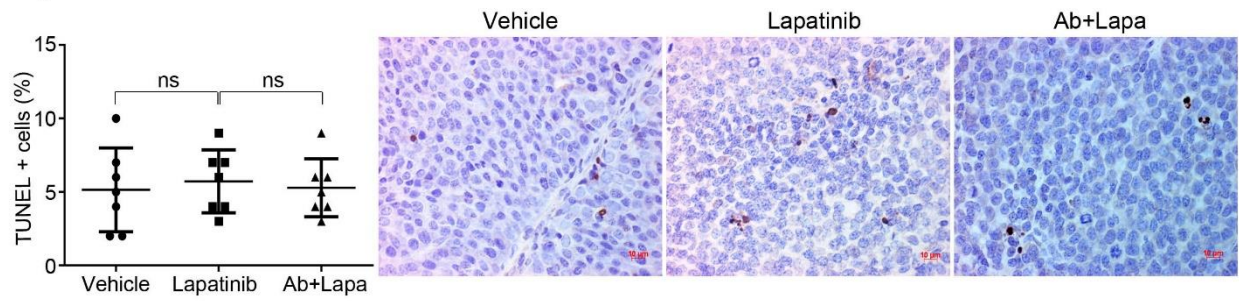

**Supplementary information, Figure S2** TUNEL staining of the tumor tissue obtained from PTEN<sup>-/-</sup>/NIC mice treated with different drugs or their combination for determination of apoptosis. *ns*: not significant ( $P>0.05$ ) by two-tailed t-test.
