# Supplementary material
Source: PubMed Central journal article supplement (PMC4011340)
Supplement: cr201437x8.pdf [file cr201437x8.pdf]

**Figure S4**

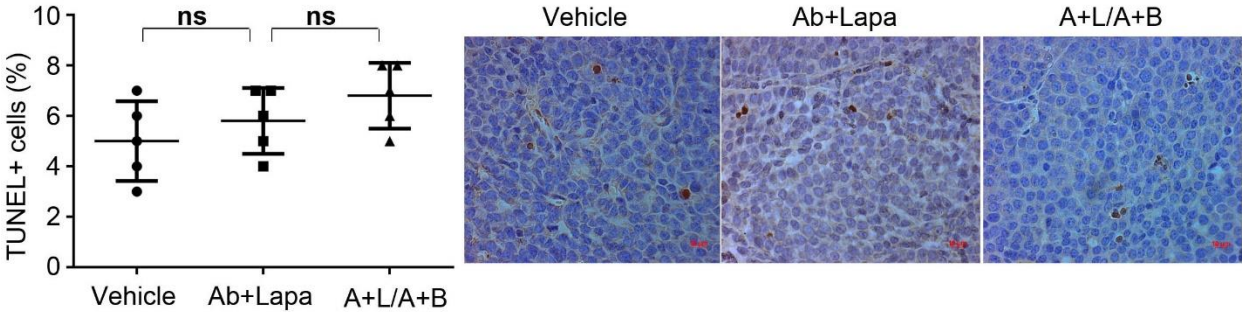

**Supplementary information, Figure S4** TUNEL staining of the tumor tissue obtained from PTEN<sup>-/-</sup>/NIC mice treated with vehicle, Ab+Lapa or sequential A+L/A+B for determination of apoptosis. *ns*: not significant ( $P>0.05$ ) by two-tailed t-test.
