# Supplementary material
Source: PubMed Central journal article supplement (PMC4011340)
Supplement: cr201437x10.pdf [file cr201437x10.pdf]

**Figure S6**

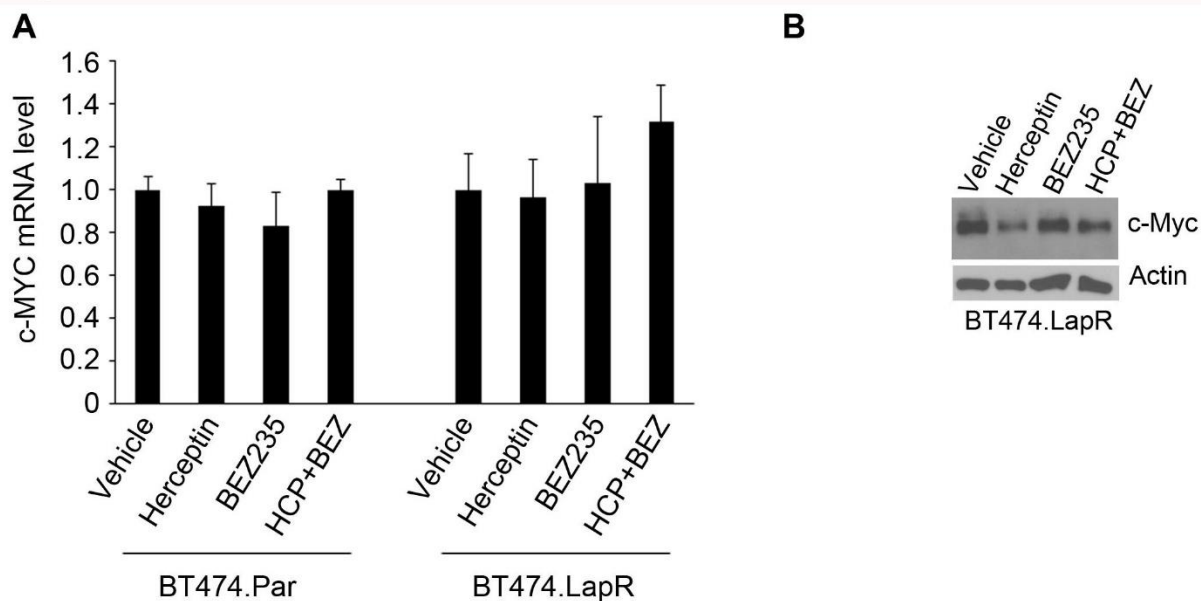

**Supplementary information, Figure S6** BEZ235 treatment does not significantly alter c-MYC level in 3-D culture.

**(A)** qRT-PCR analysis was done for the c-MYC mRNA level in BT474.Par and BT474.LapR cells treated with vehicle, Herceptin, BEZ235, or Herceptin+BEZ235. 18S was used as housekeeping gene control. **(B)** BT474.LapR cells were treated as in A followed by western blot for c-Myc. Actin was used as a loading control.
