# Supplementary material
Source: PubMed Central journal article supplement (PMC4011340)
Supplement: cr201437x11.pdf [file cr201437x11.pdf]

**Figure S7**

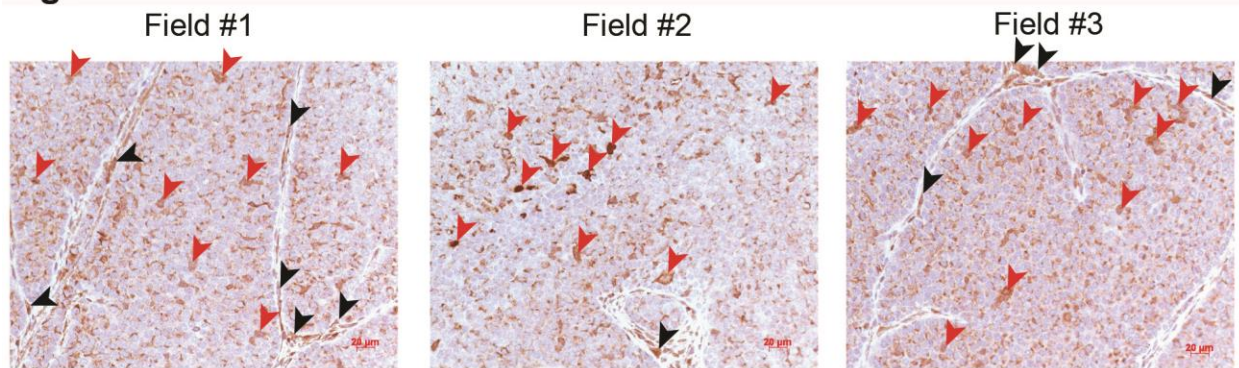

**Supplementary information, Figure S7** PTEN loss is heterogeneous in Neu-driven, PTEN-loss mouse mammary tumors.

Immunohistochemistry for PTEN (Cell Signaling antibody #9559) was performed on sections of MMTV-NIC (*Neu* overexpressing), *PTEN*<sup>-/-</sup> mouse mammary tumor tissue. Red arrows indicate examples of positively stained tumor cells; black arrows indicate positively stained stroma. Scale indicates 20 μm.
